# Supplementary figures and images for: 2-Phenyl-4,5-imidazole dicarboxylate-based metal–organic frameworks assembled under hydro(solvo)thermal conditions
Source: Royal Society of Chemistry journal article supplement (doi:10.1039/c1ce05394a), 2011-01-01

a

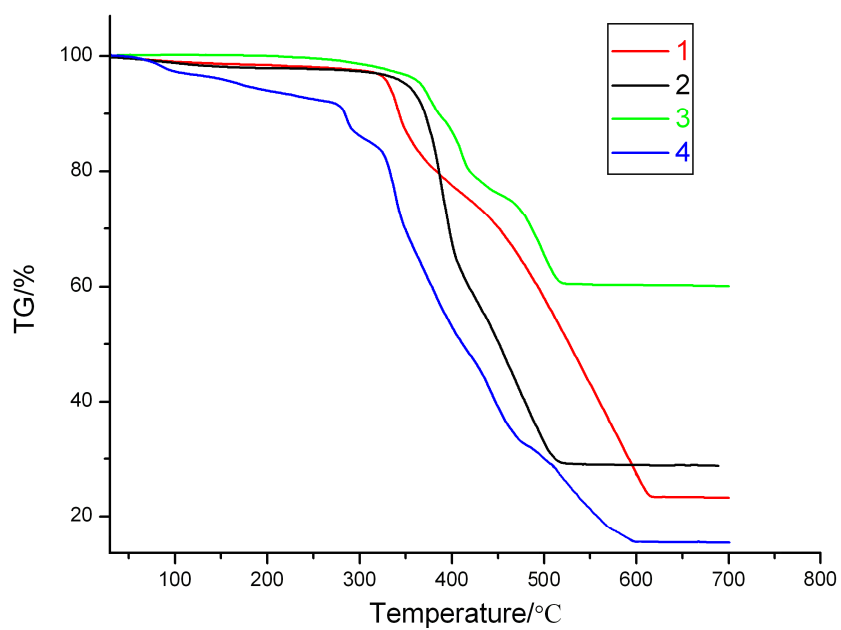

b

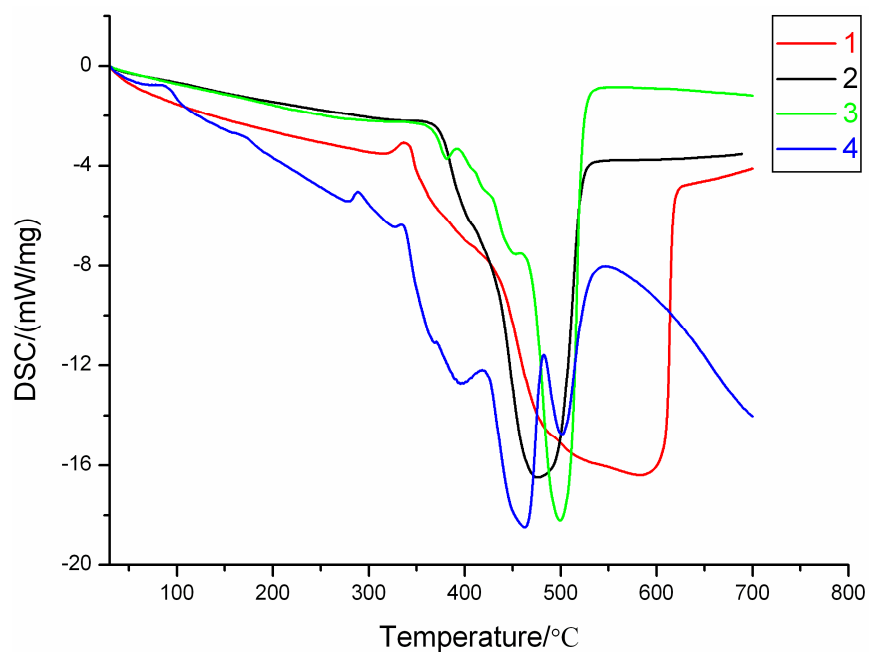

**Fig. S1** The TG (a) and DSC (b) analysis profiles of polymers 1-4

Supplement: c1ce05394a.pdf [file c1ce05394a.pdf]
